# Supplementary material for: Trehalose Treatment in Zebrafish Model of Lafora Disease
Source: MDPI journal article supplement (doi:10.3390/ijms23126874), 2022-06-20
Supplement: s1 [file s1]

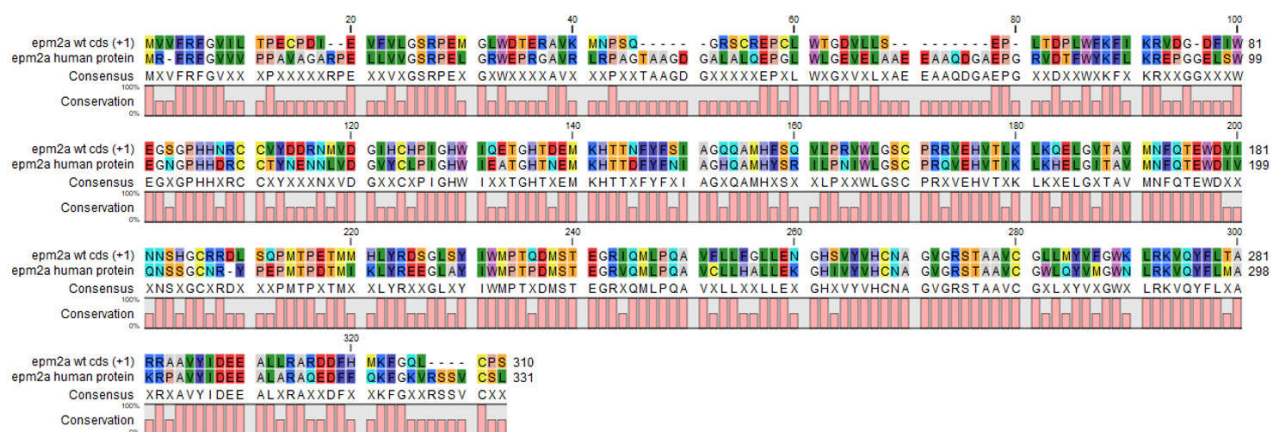

**Figure S1.** Alignment of human and zebrafish *epm2a* protein.

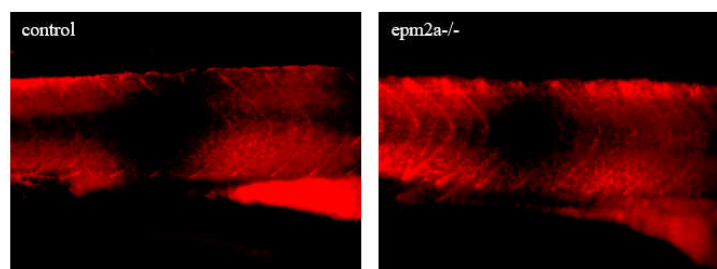

**Figure S2.** Immunocytochemistry with motor neuron marker Syt2 showed no morphological alterations in *epm2a*<sup>-/-</sup> larvae compared with wild-type control at five dpf.

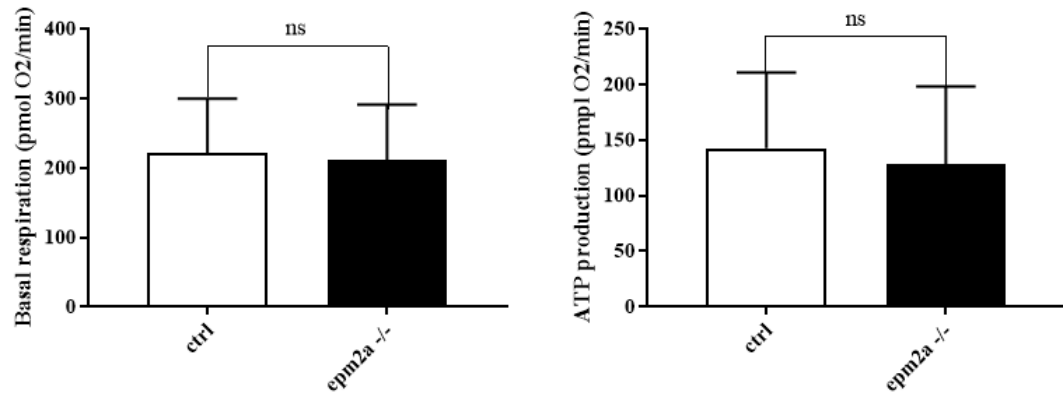

**Figure S3.** Mitochondrial respiratory analysis of controls (n = 47) and *epm2a*<sup>-/-</sup> mutant larvae (n = 48) showed no difference in baseline respiration and ATP production. Statistical analysis was calculated using a Student's t-test.

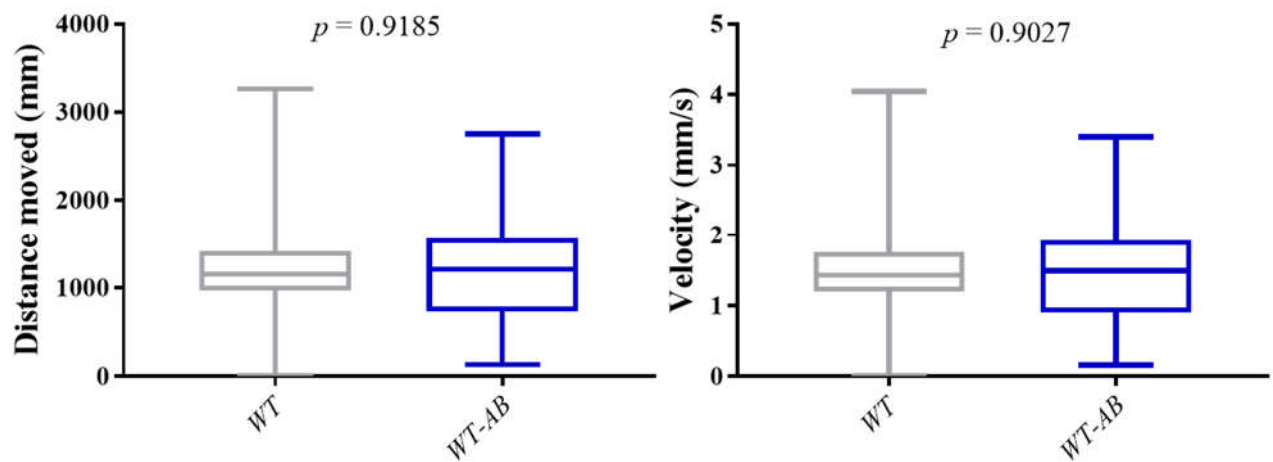

**Figure S4.** Locomotor analysis. Automated analysis of spontaneous motor activity revealed no differences in distance travelled and velocity between *mitfa*<sup>-/-</sup>; *Tg(neurod1:GCaMP6F)* (WT) (n=152) compared with WT-AB (n=85) at 120 hpf. Statistical analysis was performed using the Mann-Whitney test.

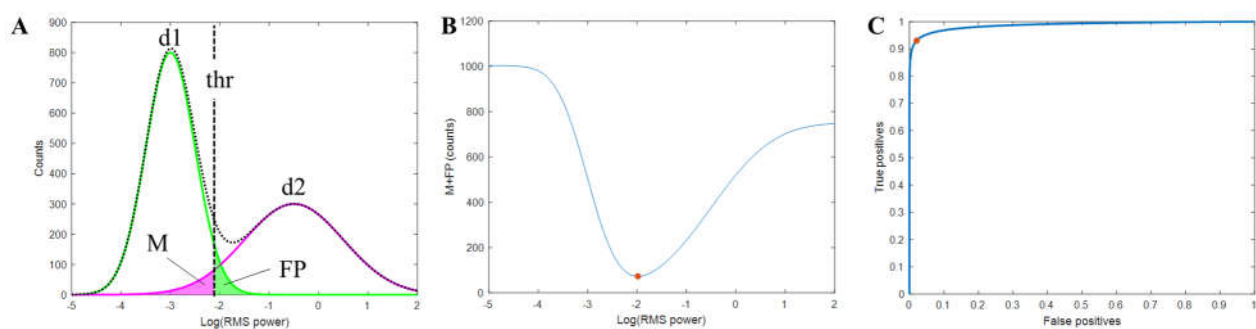

**Figure S5. Analysis pipeline for the detection of high-energy events.** (A) Distribution of the Log of the gamma power (black dotted line). The low-energy mode and high-energy mode (d1 and d2, respectively) are plotted in green and magenta. At a certain threshold (thr), we identify M (misses) and FP (false positives) as

$\int_{-\infty}^{thr} d2(x) dx$  and  $\int_{thr}^{+\infty} d1(x) dx$  respectively (integrals on discrete arrays are computed with the Matlab function 'trapz').

(B) To choose the threshold for identifying high-energy events, we define and minimize the error function  $err = M + FP$ , where  $err$ ,  $M$ , and  $FP$  are a function of  $thr$ . The threshold is set as the minimum of  $err$ , indicated with a red dot. (C) ROC function. In this example, the area under the curve (AUC) is 0.9872. The position on the ROC curve for the chosen  $thr$  is indicated with a red dot.

**Table S1.** Comparing traits of zebrafish, mouse and human patients with *EPM2A* mutations.

|                            | Human                                                                                      | Mouse                                                                                                                           | Zebrafish                                                                                         |
|----------------------------|--------------------------------------------------------------------------------------------|---------------------------------------------------------------------------------------------------------------------------------|---------------------------------------------------------------------------------------------------|
| Gene                       | <i>EPM2A</i>                                                                               | <i>Epm2a</i>                                                                                                                    | <i>epm2a</i>                                                                                      |
| Mutation                   | Over 50 mutations described, the most common mutation is the p.R241X                       | <i>Epm2a</i> -KO mice, several double-KO mice, and recently, the first laforin-R240X knock-in mouse model was developed         | <i>epm2a</i> -KO ZF (p.Thr54Asnfs*74)                                                             |
| Neuropathological features | Glycogen accumulation, Lafora bodies, neuronal death, impaired autophagy, oxidative stress | Glycogen accumulation, Lafora bodies, neuronal cell death, impaired autophagy, oxidative stress and increased neuroinflammation | Glycogen accumulation, increased brain apoptosis, impaired autophagy, increased neuroinflammation |
| Phenotype                  | Progressive drug-resistant myoclonus and seizures, cerebellar ataxia and dementia          | Impaired behavioral responses, ataxia, spontaneous myoclonic seizures or PTZ-induced seizures and EEG epileptiform activity     | Locomotor impairment and spontaneous seizures                                                     |
| References                 | 1-2-4-5-15-21-22-28-29-32-33                                                               | 12-13-16-21-22-23-24-29-34-45-46-60-61-62                                                                                       | This study                                                                                        |

**Table S2.** sgRNA sequence and primers for genotyping.

|                     |                                                                         |
|---------------------|-------------------------------------------------------------------------|
| <i>epm2a-sgrna1</i> | 5'-<br>TAATACGACTCACTATAGGAGCCGTGCCTGTGGACCGGTTTTAGAGCTAGAAATAGC-<br>3' |
| <i>epm2a-1F</i>     | TCATGGCCAAAACCCCTCTAAAAC                                                |
| <i>epm2a-1R</i>     | CCCCACCACTAATATATACCAAAAGT                                              |

**Table S3.** Primers used for the whole-mount in situ hybridization.

|                       |                                               |
|-----------------------|-----------------------------------------------|
| <i>epm2a-ish-f</i>    | GTTTAAGTTCATAAAGCGGGTCGAT                     |
| <i>epm2a-T3-ish-f</i> | AATTAACCCTCACTAAAGGGGTTTAAGTTCATAAAGCGGGTCGAT |
| <i>epm2a-ish-r</i>    | CAGAGCTGTCCAAACTTCATATGAA                     |
| <i>epm2a-T3-ish-r</i> | AATTAACCCTCACTAAAGGGCAGAGCTGTCCAAACTTCATATGAA |

**Table S4:** qPCR primers used for gene expression analysis.

| Gene               | Nucleotide sequence       |
|--------------------|---------------------------|
| <i>epm2a-Fw</i>    | TGTTTCAGGTTTGGTGTATTTTGAC |
| <i>epm2a-Rv</i>    | ATCCACCATGTTTCTGTCATCATAC |
| <i>tfeb-Fw</i>     | AAGAAAGACAACCACAACCTGATT  |
| <i>tfeb-Rv</i>     | ACATCCTTCTGCATGCGTTTAATA  |
| <i>beclin-1 Fw</i> | GGCTTTCCTTGACTGTGTCC      |
| <i>beclin-1 Rv</i> | CCTTTGTCCACATCCATTCTG     |
| <i>mtor-Fw</i>     | TTATCGTGCTGGTCCGAGCT      |
| <i>mtor-Rv</i>     | AAGTGGGCCCTTATCGCTGT      |
| <i>atg5-Fw</i>     | AGAGAGGCAGAACCCCTACTATC   |
| <i>atg5-Rv</i>     | CCTCGTGTTCAAACCACATTTTC   |
| <i>atg12-Fw</i>    | TTCATCTCACGCTTCCTCAA      |
| <i>atg12-Rv</i>    | CGTCACTTCCGAAACACTCA      |
| <i>lc3a-Fw</i>     | CGAGTCGACCGACAATTTAGC     |
| <i>lc3a-Rv</i>     | TCCTTGCAACGATCAGCGAA      |

|                   |                          |
|-------------------|--------------------------|
| <i>p62-Fw</i>     | CGATGTTTTGTCTCGGTCTCA    |
| <i>p62-Rv</i>     | CAAGAGCCAAACCCATCATT     |
| <i>cox2b-Fw</i>   | CCCTGTCAGAATCGAGGTGT     |
| <i>cox2b-Rv</i>   | TTGGGAGAAGGCTTCAGAGA     |
| <i>tnfa-Fw</i>    | GGGCAATCAACAAGATGGAAG    |
| <i>tnfa-Rv</i>    | GCAGCTGATGTGCAAAGACAC    |
| <i>il1b-Fw</i>    | GGACTTCGCAGCACAAAATGAA   |
| <i>il1b-Rv</i>    | TTCACTTCACGCTCTTGATGA    |
| <i>il10-Fw</i>    | CTTTAAAGCACTCCACAACCCCAA |
| <i>il10-Rv</i>    | CTTGCAATTCACCATATCCCGCTT |
| <i>gfap-Fw</i>    | GCTCTGAGACAAGCGAAGCA     |
| <i>gfap-Rv</i>    | CACGGAGAGATTCCAGGTTCA    |
| <i>kcnj10b-Fw</i> | GCGGCGAGACGATTGCTTCA     |
| <i>kcnj10b-Rv</i> | CTTCCCCGTCACCTGGCAACC    |
| <i>hexb-Fw</i>    | CTTTGGGGAGAGTATGTGGACGC  |
| <i>hexb-Rv</i>    | CAGGTATGCCTCTCCTGACCAT   |
| <i>p2ry12-Fw</i>  | CTTCAGGTCGTCGCTGTTTA     |
| <i>p2ry12-Rv</i>  | AGTGCGTTTCCCTGTTGAT      |
| <i>csf1ra-Fw</i>  | CCTGATCCGCAACGTTTCATCCT  |
| <i>csf1ra-Rv</i>  | GCTTTGGGCAGCATTCTTGAGG   |
| <i>bactin2-Fw</i> | GCAGAAGGAGATCACATCCCTGGC |
| <i>bactin2-Rv</i> | CATTGCCGTCACCTTCACCGTTC  |
